## Research Article

# *TNFAIP8L1* and *FLT1* polymorphisms alter the susceptibility to cervical cancer amongst Uyghur females in China

Lili Han, Sulaiya Husaiyin, Chunhua Ma, Lin Wang and  Mayinuer Niyazi

Department of Gynecology, People's Hospital of Xinjiang Uygur Autonomous Region, Urumqi, Xinjiang 830001, China

**Correspondence:** Mayinuer Niyazi (mynr68@126.com) or Lin Wang (13579296286@163.com)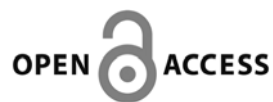

*TNFAIP8L1* and *FLT1* play critical roles in the occurrence and development of tumors, but no in-depth studies have been carried out in cervical cancer. The present study aims to research the correlation between polymorphisms of these two genes and the risk of cervical cancer in the Uyghur women. The study involved 342 cervical cancer patients and 498 healthy women. Five single nucleotide polymorphisms (SNPs) from the *TNFAIP8L1* gene and the *FLT1* gene were selected and genotyped. Odds ratio and 95% CIs were calculated by logistic regression analysis to evaluate the correlation between SNPs and cervical cancer risk. The alleles rs9917028-A ( $P=0.032$ ), rs10426502-A ( $P=0.007$ ), and rs1060555-G ( $P=0.026$ ) of *TNFAIP8L1* were associated with a decreased risk of cervical cancer. In the multiple genetic models, these three SNPs were also associated with the risk of cervical cancer. The stratified analysis showed that *TNFAIP8L1*-rs10426502, -rs1060555, and *FLT1*-rs9513111 were associated with a decreased risk of cervical cancer amongst people older than 43 years. Moreover, the haplotypes AG ( $P=0.007$ ) and GC ( $P=0.026$ ) of linkage disequilibrium block rs10426502|rs1060555 in *TNFAIP8L1* were significantly associated with an increased risk of cervical cancer. Our results suggested that the relationships between *TNFAIP8L1* and *FLT1* polymorphisms and the risk of cervical cancer amongst Uyghur females.

## Introduction

Cervical cancer is the third most common cancer amongst women worldwide, with 527,624 new cases and 265,672 deaths in 2012 [1]. It is estimated that by 2020, there will be 609,270 new cases and 317,727 deaths worldwide [2]. While cancer-related mortality has decreased with the implementation of screening programs worldwide, incidence is on the rise in developing countries, where about 80% of cases occur [3]. China is a multiethnic country, the incidence of cervical cancer in all ethnic groups is different, and of which Xinjiang Uygur population incidence is the highest. In recent years, much attention has been paid to the study of cervical cancer in Uyghur women [4]. However, the pathogenesis of cervical cancer was not fully understood. Etiological studies have shown that cervical cancer is the result of a combination of factors, including the high-risk human papillomavirus (HPV) infection, environmental, behavioral, and genetic factors [5,6]. In recent years, increasing evidence has emphasized the role of genetic factors in the pathogenesis of cervical cancer. Studies based on single nucleotide polymorphisms (SNPs) and genome-wide association studies have confirmed the relationship between genetic variations and the risk of cervical cancer in different populations [7–9].

Tumor necrosis factor (TNF)- $\alpha$ -induced protein 8 (TNFAIP8) is a recently identified protein family reported to have important roles in immunity, inflammation, and tumorigenesis. TNFAIP8L1 is a member of the TNFAIP8 family [10]. Past studies have shown a strong correlation between TNFAIP8 protein

Received: 12 May 2019  
Revised: 14 June 2019  
Accepted: 06 July 2019Accepted Manuscript Online:  
09 July 2019  
Version of Record published:  
19 July 2019

and the development of a variety of cancers, including gynecological cancers such as breast cancer, cervical cancer, ovarian cancer, and endometrial cancer [11]. In addition, the regulation of these proteins has been found to promote basic characteristics of cancer, such as tumor growth, proliferation, inhibition of apoptosis, and angiogenesis [12]. However, the exact function of *TNFAIP8L1* in cervical cancer is unknown. The *FLT1* gene encodes VEGFR1, a member of the vascular endothelial growth factor receptor (VEGFR) family. The VEGF system is crucial for angiogenesis, which is considered to be the key to the occurrence of malignant tumors [13,14]. A previous study showed that *VEGF* is an important regulator of endometrial tumor angiogenesis, and *FLT1* is a great marker of vascular proliferation [15,16]. At present, the function of *FLT1* in cervical cancer has not been deeply studied.

In this case-control study, we investigated the association between SNPs of *TNFAIP8L1* and *FLT1* genes and cervical cancer risk amongst Xinjiang Uygur females.

## Materials and methods

### Study population

A total of 342 patients were recruited from the People's Hospital of Xinjiang Uygur Autonomous Region as preliminary samples. All patients were pathologically confirmed with cervical cancer by at least two pathologists. The International Federation of Gynecology and Obstetrics (FIGO) stage was also recorded for further analysis. Notably, patients who received systemic or topical treatment were excluded from our study. In addition, women eligible for age and ethnicity were recruited continuously from the same hospital health screening center as a control group. Finally, the study included 498 healthy individuals with no history of gynecologic disease or tumors. All participants were from Xinjiang Uygur ethnic group.

### DNA genotyping

The total DNA isolation was performed from the peripheral blood samples provided by the experimental subjects using the GoldMag DNA Purification Kit (GoldMag Co. Ltd, Xi'an City, China). The concentration and quality of the purified DNA were measured with Nanodrop 2000 UV spectrophotometer (Thermo Scientific, Waltham, MA, U.S.A.). Screening the polymorphisms with minor allele frequency (MAF) more than 5% in the 1000 genomes database (<http://www.internationalgenome.org/>) and the dbSNP database (<https://www.ncbi.nlm.nih.gov/projects/SNP/>). We eventually selected five SNPs including rs9917028, rs10426502, and rs1060555 of *TNFAIP8L1* and rs9513111 and rs677471 of *FLT1* for further genotype identification and risk association analysis. The Agena Bioscience Assay Design Suite software, version 2.0 (<https://agenacx.com/online-tools/>) was applied for MassARRAY assay design. The SNP genotype was identified by the MassARRAY Nanodispenser and MassARRAY iPLEX method (Agena Bioscience, San Diego, CA, U.S.A.) according to the manufacturer's instructions. Data management and presentation were conducted by the Agena Bioscience TYPER software, version 4.0 [17–19].

### Statistical analysis

All the basic statistical analyses were carried out using SPSS 20.0 (SPSS, Chicago, IL, U.S.A.) and Microsoft Excel. Age distribution differences between cases and healthy controls were analyzed by the independent sample *t*-test. The departure from Hardy-Weinberg equilibrium (HWE) was determined by comparing the observed and expected heterozygosity on controls with the Chi-square test. Statistical significance was defined as *P*-value less than 0.05. All *P*-values were two tailed. Furthermore, the association study was performed in multiple inheritance models (co-dominant, dominant, recessive, and additive) using SNPstats software (<http://bioinfo.iconcologia.net/SNPstats>). Odds ratio (ORs) values and 95% CIs were calculated using an age-adjusted logistic regression to assess the risk of cervical cancer. Haploview 4.2 software (Cambridge, MA, U.S.A.) was used to determine the pairwise linkage disequilibrium (LD), using the standardized *D'* and *r*<sup>2</sup> values. The false-positive report probability (FPRP) was calculated to evaluate the significant results using the SAS software 9.4 (SAS Institute, Cary, N.C., U.S.A.). We set 0.2 as the FPRP threshold to detect an OR of 0.67/1.50 (protective/risk effect) associated with genotype and haplotype in the study. The FPRP value of less than 0.2 was considered a significant finding [20,21].

## Results

### Characteristics of the study subjects

In the present study, the age distribution was matched between the case group and the control group (*P*>0.05). A total of 342 cervical cancer patients and 498 healthy subjects were included, with the average age of 43.46 and 43.27, respectively (Table 1). Moreover, the frequency distribution of the cervical cancer patients regarding FIGO stage and HPV status were calculated and listed in Table 1.

**Table 1 Characteristics of the study population**

| Variable                 | Cases         | Controls      | P-value |
|--------------------------|---------------|---------------|---------|
| <b>Age (mean ± S.D.)</b> | 43.46 ± 13.03 | 43.27 ± 11.78 | 0.829   |
| ≤43                      | 166 (49%)     | 235 (53%)     |         |
| >43                      | 176 (51%)     | 263 (47%)     |         |
| <b>Stage</b>             |               |               |         |
| I-II                     | 132 (39%)     |               |         |
| III-IV                   | 80 (23%)      |               |         |
| Absent                   | 130 (38%)     |               |         |
| <b>HPV status</b>        |               |               |         |
| Negative                 | 51 (15%)      |               |         |
| Positive                 | 195 (57%)     |               |         |
| Absent                   | 96 (28%)      |               |         |
| <b>Total</b>             | 342           | 498           |         |

P-value obtained from independent sample *t*-test.

**Table 2 Basic information regarding candidate SNPs**

| SNP        | Chromosome | Position | Alleles | Gene             | Role   | MAF   |         | HWE<br>P-value | OR<br>(95% CI)                    | P-value      |
|------------|------------|----------|---------|------------------|--------|-------|---------|----------------|-----------------------------------|--------------|
|            |            |          |         |                  |        | Case  | Control |                |                                   |              |
| rs9917028  | Chr19      | 4640971  | G/A     | <i>TNFAIP8L1</i> | Intron | 0.330 | 0.382   | 0.107          | <b>0.80</b><br><b>(0.65-0.98)</b> | <b>0.032</b> |
| rs10426502 | Chr19      | 4651257  | G/A     | <i>TNFAIP8L1</i> | Intron | 0.037 | 0.067   | 0.154          | <b>0.53</b><br><b>(0.33-0.84)</b> | <b>0.007</b> |
| rs1060555  | Chr19      | 4652810  | C/G     | <i>TNFAIP8L1</i> | 3'UTR  | 0.238 | 0.287   | 0.154          | <b>0.78</b><br><b>(0.62-0.97)</b> | <b>0.026</b> |
| rs9513111  | Chr13      | 28423426 | C/T     | <i>FLT1</i>      | Intron | 0.326 | 0.674   | 0.766          | 0.91<br>(0.74-1.12)               | 0.385        |
| rs677471   | Chr13      | 28489675 | C/T     | <i>FLT1</i>      | Intron | 0.355 | 0.645   | 0.160          | 1.08<br>(0.88-1.33)               | 0.448        |

P-values were calculated with Chi-square tests.  $P < 0.05$  indicates statistical significance.

## Basic information for the candidate SNPs

Basic information and preliminary statistical results of the selected SNPs are shown in Table 2. HWE *P*-values were obtained with Chi-square tests and all SNPs (rs9917028, rs10426502, rs1060555, rs9513111, and rs677471) were in HWE ( $P > 0.05$ ). The values of the MAF were higher than 5%.

## SNPs and cervical cancer risk

The differences in allele frequency between cases and controls were compared by  $\chi^2$  test (Table 2). The allele with lower frequency of each SNP was regarded as a risk factor. The results indicated that alleles rs9917028-A ( $P = 0.032$ ), rs10426502-A ( $P = 0.007$ ), and rs1060555-G ( $P = 0.026$ ) of *TNFAIP8L1* were risk alleles for cervical cancer amongst Xinjiang Uygur female.

As showed in Table 3, significant associations were existed between *TNFAIP8L1* rs9917028, and decreased risk of cervical cancer in allele model, co-dominant model, and additive model (allele model: OR = 0.80, 95% CI: 0.65–0.98,  $P = 0.032$ ; co-dominant model: OR = 0.64, 95% CI: 0.42–0.99,  $P = 0.044$ ; additive model: OR = 0.81, 95% CI: 0.66–0.99,  $P = 0.039$ ). *TNFAIP8L1* rs10426502 and rs1060555 were decreased risk of cervical cancer in allele model, co-dominant model, dominant model, and additive model (rs10426502: allele model: OR = 0.53, 95% CI: 0.33–0.84,  $P = 0.007$ ; co-dominant model: OR = 0.47, 95% CI: 0.28–0.76,  $P = 0.003$ ; dominant model: OR = 0.49, 95% CI: 0.30–0.79,  $P = 0.004$ ; additive model: OR = 0.52, 95% CI: 0.32–0.83,  $P = 0.007$ . rs1060555: allele model: OR = 0.78, 95% CI: 0.62–0.97,  $P = 0.026$ ; co-dominant model: OR = 0.70, 95% CI: 0.52–0.93,  $P = 0.015$ ; dominant model: OR = 0.70, 95% CI: 0.53–0.93,  $P = 0.012$ ; additive model: OR = 0.77, 95% CI: 0.61–0.97,  $P = 0.024$ ).

Based on age stratification, we tried to determine the effect of these variants on the risk of cervical cancer, as showed in Table 4. In accordance with our statistically significant findings of the allele model, the minor allele of rs10426502,

**Table 3** The relationship between *TNFAIP8L1* gene polymorphism and cervical cancer

| SNP        | Model       | Genotype | Case         | Control                 | Adjusted by age         |              |
|------------|-------------|----------|--------------|-------------------------|-------------------------|--------------|
|            |             |          |              |                         | OR (95% CI)             | P-value      |
| rs9917028  | Co-dominant | GG       | 157 (46%)    | 199 (40%)               | 1                       |              |
|            |             | GA       | 144 (42%)    | 218 (44%)               | 0.84 (0.62–1.13)        | 0.241        |
|            |             | AA       | 41 (12%)     | 81 (16%)                | <b>0.64 (0.42–0.99)</b> | <b>0.044</b> |
|            | Dominant    | GG       | 157 (46%)    | 199 (40%)               | 1                       |              |
|            |             | GA-AA    | 185 (54%)    | 299 (60%)               | 0.78 (0.59–1.04)        | 0.088        |
|            | Recessive   | GG-GA    | 301 (88%)    | 417 (84%)               | 1                       |              |
| AA         |             | 41 (12%) | 81 (16%)     | 0.70 (0.47–1.05)        | 0.087                   |              |
| rs10426502 | Co-dominant | GG       | 317 (93%)    | 431 (83%)               | 1                       |              |
|            |             | GA       | 23 (6%)      | 67 (17%)                | <b>0.47 (0.28–0.76)</b> | <b>0.003</b> |
|            |             | AA       | 1 (1%)       | 0 (0%)                  | —                       | 0.999        |
|            | Dominant    | GG       | 317 (93%)    | 431 (83%)               | 1                       |              |
|            |             | GA-AA    | 24 (7%)      | 67 (17%)                | <b>0.49 (0.30–0.79)</b> | <b>0.004</b> |
|            | Recessive   | GG-GA    | 341 (91.90%) | 498 (100%)              | 1                       |              |
| AA         |             | 1 (1%)   | 0 (0%)       | —                       | 0.999                   |              |
| rs1060555  | Co-dominant | CC       | 199 (58%)    | 246 (49%)               | 1                       |              |
|            |             | CG       | 123 (36%)    | 218 (44%)               | <b>0.70 (0.52–0.93)</b> | <b>0.015</b> |
|            |             | GG       | 20 (6%)      | 34 (7%)                 | 0.73 (0.41–1.30)        | 0.285        |
|            | Dominant    | CC       | 199 (58%)    | 246 (49%)               | 1                       |              |
|            |             | CG-GG    | 143 (42%)    | 252 (57%)               | <b>0.70 (0.53–0.93)</b> | <b>0.012</b> |
|            | Recessive   | CC-CG    | 322 (94%)    | 464 (93%)               | 1                       |              |
| GG         |             | 20 (6%)  | 34 (7%)      | 0.85 (0.48–1.50)        | 0.571                   |              |
| Additive   | —           | —        | —            | <b>0.77 (0.61–0.97)</b> | <b>0.024</b>            |              |

P-values were calculated with wald-test.  $P < 0.05$  indicates statistical significance.

and rs1060555 in *TNFAIP8L1* played roles in reducing the risk of cervical cancer in Uyghur women over 43 years old (rs10426502: OR = 0.44, 95% CI: 0.22–0.88,  $P = 0.017$ ; rs1060555: OR = 0.72, 95% CI: 0.53–0.97,  $P = 0.033$ ). Amongst Uyghur women under 43 years of age, the rs9917028-‘AA’ genotype of *TNFAIP8L1* reduced the risk of cervical cancer in genotype model and additive model (genotype model: OR = 0.45, 95% CI: 0.22–0.91,  $P = 0.026$ ; additive model: OR = 0.47, 95% CI: 0.24–0.91,  $P = 0.025$ ). Amongst Uyghur women over 43 years of age, individuals carrying the heterozygous genotype rs1060555-‘CG’ in *TNFAIP8L1* (OR = 0.40, 95% CI: 0.17–0.92,  $P = 0.017$ ) were less likely to suffer from cervical cancer when compared with the homozygous ‘CC’. In addition, rs10426502 and rs1060555 of *TNFAIP8L1* were significantly associated with reduced risk of cervical cancer in the dominant and additive models, as well as rs9513111 of *FLT1* was significantly associated with reduced risk of cervical cancer in the recessive model ( $P < 0.05$ ).

### Haplotype analyses and false-positive report

Furthermore, haplotype analyses were performed and a LD block was found in the *TNFAIP8L1* gene, formed by rs10426502-rs1060555 (Figure 1). The haplotypes AG (OR = 1.94, 95% CI: 0.20–3.13,  $P = 0.007$ ) and GC (OR = 1.30, 95% CI: 1.03–1.63,  $P = 0.026$ ) were significantly associated with an increased risk for cervical cancer in Uyghur population (Table 5).

FPRP values at different prior probability levels were calculated to evaluate significance results (Supplementary Table S1). For a prior probability of 0.1, the FPRP values were less than 0.2 for the associations of rs10426502, rs1060555 alleles, and genotypes with decreased risk of cervical cancer (rs10426502: allele-A: 0.094; GA: 0.045; GA-AA: 0.062. rs1060555: allele-G: 0.187 CG: 0.112; CG-GG: 0.112). And the FPRP values were also less than 0.2 for the associations of haplotypes with increased risk of cervical cancer (rs10426502|rs1060555: AG: 0.098; GC: 0.172). In contrast, we observed greater FPRP values for the significant associations between rs9917028 and cervical cancer risk, suggesting some possible bias in the findings due to limited sample size, which need further validation in larger sample.

**Table 4 Relationships between *TNFAIP8L1* and *FLT1* polymorphism and cervical cancer risk according to the stratification by age**

| SNP Gene                       | Model     | Genotype | ≤43                     |              | >43                     |              |
|--------------------------------|-----------|----------|-------------------------|--------------|-------------------------|--------------|
|                                |           |          | OR (95% CI)             | P-value      | OR (95% CI)             | P-value      |
| rs9917028<br><i>TNFAIP8L1</i>  | Allele    | G        | 1                       |              | 1                       |              |
|                                |           | A        | 0.75 (0.56–1.02)        | 0.064        | 0.84 (0.64–1.12)        | 0.238        |
|                                | Genotype  | GG       | 1                       |              | 1                       |              |
|                                |           | GA       | 0.94 (0.61–1.43)        | 0.766        | 0.75 (0.50–1.15)        | 0.187        |
|                                |           | AA       | <b>0.45 (0.22–0.91)</b> | <b>0.026</b> | 0.80 (0.46–1.40)        | 0.434        |
|                                | Dominant  | GG       | 1                       |              | 1                       |              |
|                                |           | GA-AA    | 0.81 (0.54–1.21)        | 0.305        | 0.77 (0.52–1.13)        | 0.180        |
|                                | Recessive | GG-GA    | 1                       |              | 1                       |              |
|                                |           | AA       | <b>0.47 (0.24–0.91)</b> | <b>0.025</b> | 0.92 (0.55–1.55)        | 0.757        |
|                                |           | —        | 0.75 (0.56–1.02)        | 0.065        | 0.86 (0.66–1.13)        | 0.281        |
| rs10426502<br><i>TNFAIP8L1</i> | Allele    | G        | 1                       |              | 1                       |              |
|                                |           | A        | 0.62 (0.33–1.19)        | 0.149        | <b>0.44 (0.22–0.88)</b> | <b>0.017</b> |
|                                | Genotype  | GG       | 1                       |              | 1                       |              |
|                                |           | GA       | 0.53 (0.26–1.07)        | 0.077        | —                       | —            |
|                                |           | AA       | —                       | 0.999        | —                       | —            |
|                                | Dominant  | GG       | 1                       |              | 1                       |              |
|                                |           | GA-AA    | 0.57 (0.29–1.14)        | 0.112        | <b>0.42 (0.21–0.86)</b> | <b>0.017</b> |
|                                | Recessive | GG-GA    | 1                       |              | 1                       |              |
|                                |           | AA       | —                       | 0.999        | —                       | —            |
|                                |           | —        | 0.63 (0.33–1.22)        | 0.173        | <b>0.42 (0.21–0.86)</b> | <b>0.017</b> |
| rs1060555<br><i>TNFAIP8L1</i>  | Allele    | C        | 1                       |              | 1                       |              |
|                                |           | G        | 0.86 (0.62–1.19)        | 0.355        | <b>0.72 (0.53–0.97)</b> | <b>0.033</b> |
|                                | Genotype  | CC       | 1                       |              | 1                       |              |
|                                |           | CG       | 0.94 (0.62–1.42)        | 0.760        | <b>0.54 (0.36–0.82)</b> | <b>0.003</b> |
|                                |           | GG       | 0.59 (0.22–1.60)        | 0.303        | 0.79 (0.38–1.64)        | 0.527        |
|                                | Dominant  | CC       | 1                       |              | 1                       |              |
|                                |           | CG-GG    | 0.89 (0.60–1.34)        | 0.583        | <b>0.58 (0.39–0.85)</b> | <b>0.005</b> |
|                                | Recessive | CC-CG    | 1                       |              | 1                       |              |
|                                |           | GG       | 0.61 (0.23–1.62)        | 0.321        | 1.03 (0.50–2.10)        | 0.935        |
|                                |           | —        | 0.87 (0.61–1.22)        | 0.406        | <b>0.71 (0.52–0.97)</b> | <b>0.030</b> |
| rs9513111<br><i>FLT1</i>       | Allele    | T        | 1                       |              | 1                       |              |
|                                |           | C        | 1.05 (0.78–1.41)        | 0.773        | 0.81 (0.61–1.08)        | 0.144        |
|                                | Genotype  | TT       | 1                       |              | 1                       |              |
|                                |           | TC       | 0.89 (0.58–1.36)        | 0.581        | 1.02 (0.68–1.54)        | 0.913        |
|                                |           | CC       | 1.38 (0.69–2.76)        | 0.359        | 0.55 (0.29–1.04)        | 0.067        |
|                                | Dominant  | TT       | 1                       |              | 1                       |              |
|                                |           | TC-CC    | 0.96 (0.64–1.44)        | 0.852        | 0.89 (0.61–1.31)        | 0.561        |
|                                | Recessive | TT-TC    | 1                       |              | 1                       |              |
|                                |           | CC       | 1.47 (0.76–2.83)        | 0.250        | <b>0.54 (0.29–0.99)</b> | <b>0.049</b> |
|                                |           | —        | 1.06 (0.78–1.45)        | 0.695        | 0.82 (0.62–1.09)        | 0.166        |

P-values were calculated with wald-test.  $P < 0.05$  indicates statistical significance.

**Table 5 Haplotype frequencies of *TNFAIP8L1* SNPs and the association with cervical cancer risk**

| Gene             | Haplotype            | Haplotype frequency |         | OR (95% CI)             | P-value      |
|------------------|----------------------|---------------------|---------|-------------------------|--------------|
|                  |                      | Case                | Control |                         |              |
| <i>TNFAIP8L1</i> | rs10426502 rs1060555 |                     |         |                         |              |
|                  | _AG_                 | 0.9633              | 0.933   | <b>1.94 (1.20–3.13)</b> | <b>0.007</b> |
|                  | _GG_                 | 0.7977              | 0.780   | 1.11 (0.87–1.42)        | 0.386        |
|                  | _GC_                 | 0.761               | 0.713   | <b>1.30 (1.03–1.63)</b> | <b>0.026</b> |

P-values were calculated with Pearson's Chi-square tests.  $P < 0.05$  indicates statistical significance.

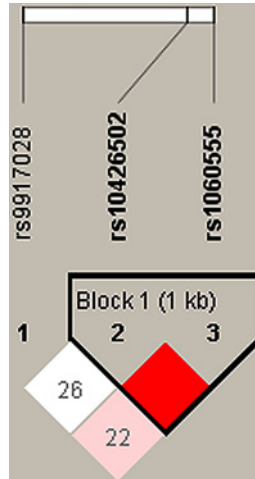

**Figure 1. LD block construction**

Block rs10426502-rs1060555 was detected in *TNFAIP8L1*. ( $D' = 1.0$ ,  $r^2 = 0.159$ ).

## Discussion

In the present study, selected SNPs in *TNFAIP8L1* and *FLT1* and their association with cervical cancer risk were investigated for the first time. Three *TNFAIP8L1* variants and one variant of *FLT1* were associated with reduced cervical cancer susceptibility amongst females from Xinjiang Uyghur Autonomous Region of China.

*TNFAIP8L1* plays an important role in malignant tumor. Immunohistochemistry and western blot analysis showed that *TNFAIP8L1*-specific antibodies were expressed in both male and female reproductive organs and germ cell tissues of mice. In addition, elevated *TNFAIP8L1* mRNA levels were detected in human gynecological cancer cells, including cervical and ovarian cancer cells [22]. As a regulator of cell death, *TNFAIP8L1* plays an indispensable role in tumor cell necrosis. Studies have shown that *TNFAIP8L1* can induce hepatocellular carcinoma cell apoptosis by interacting with Rac1 [23,24]. In support of this view, *TNFAIP8L1* expression was down-regulated in hepatocellular carcinoma tissues compared with adjacent normal tissues. In addition, *TNFAIP8L1* was found to significantly reduce tumor burden *in vivo* and cell proliferation *in vitro*. Similar to hepatocellular carcinoma, down-regulation of *TNFAIP8L1* has also been observed in lung cancer [12]. Our study showed that these three candidate SNPs (rs9917028, rs10426502, and rs1060555) were risk factors for cervical cancer amongst Uyghur women in Xinjiang. We hypothesized that these three SNPs might affect the expression and function of *TNFAIP8L1* in the development of cervical cancer.

The development and metastasis of primary tumors require angiogenesis, growth, movement, and detachment. Therefore, angiogenesis, the formation of blood vessels, has been identified as the key to the occurrence and development of malignant tumors. VEGF is considered as an important regulator of angiogenesis [15,25]. VEGF receptor 1 (*FLT1*) is one of the targets of VEGF, which can regulate the growth and migration of endothelial cells and regulate angiogenesis. Recent studies have shown that *FLT1* present and functional in different human cancer cells, and VEGF activation of *FLT1* can be involved in the process of tumor progression [26–28]. *FLT1* has been shown to be a marker of angiogenesis in endometrial cancer, but its function as a predictor has not been determined. Daniel et al. believed that the *FLT1*-snp allele might be an important risk factor for angiogenesis-related disease [15]. Currently, VEGFA and its receptor-*FLT1*, as pro-angiogenic growth factor, are related to the promotion of angiogenesis, vascular permeability, cell migration and gene expression, and have become the targets of anticancer treatment [29]. Our findings suggest that *FLT1* rs9513111 may serve as a clinical predictor in Uyghur women over 43 years of age. Our experimental results should be further verified in a larger sample size.

There are still some limitations in the present study. First, this work detected the effect of SNP of two genes on cervical cancer susceptibility, and the specific molecular mechanism needs to be further explored. Second, lack of other clinical information. Therefore, further studies with a larger sample size and functional experiments are required.

Our study validated the relationship between *TNFAIP8L1* and *FLT1* variations and the risk of cervical cancer in Uyghur women. These SNPs (rs9917028, rs10426502, rs1060555, and rs9513111) are expected to be new targets for early diagnosis and prevention of cervical cancer in Uyghur women.

## Acknowledgments

We appreciated the participants involved in the present study and the medical staff from the People's Hospital of Xinjiang Uygur Autonomous Region for sample collection.

## Ethics statement

Our study was approved by the ethics committee of the People's Hospital of Xinjiang Uygur Autonomous Region. All procedures were carried out in accordance with the ethical standards of the ethics committee and with the 1964 Helsinki declaration, and its later amendments. Informed consent was signed by each subject prior to blood samples collection.

## Author Contribution

M.N. and L.W. conceived and designed the experiments. L.H., S.H., and C.M. performed the experiments. L.H. analyzed the data. S.H. drafted the manuscript. All authors read and approved the final manuscript.

## Competing Interests

The authors declare that there are no competing interests associated with the manuscript.

## Funding

Xinjiang Tianshan Youth Program [grant number 2017Q008].

## Abbreviations

FIGO, International Federation of Gynecology and Obstetrics; FPRP, false-positive report probability; HPV, high-risk human papillomavirus; HWE, Hardy-Weinberg equilibrium; LD, linkage disequilibrium; MAF, minor allele frequency; TNF, tumor necrosis factor; VEGFR, vascular endothelial growth factor receptor.

## References

- 1 Bray, F., Ferlay, J., Soerjomataram, I., Siegel, R.L., Torre, L.A. and Jemal, A. (2018) Global cancer statistics 2018: GLOBOCAN estimates of incidence and mortality worldwide for 36 cancers in 185 countries. *CA Cancer J. Clin.* **68**, 394–424, <https://doi.org/10.3322/caac.21492>
- 2 Vargastorres, S.L., Portari, E.A., Silva, A.L., Klumb, E.M., Hc, D.R.G., Mj, D.C. et al. (2016) Roles of CDKN1A gene polymorphisms (rs1801270 and rs1059234) in the development of cervical neoplasia. *Tumour Biol.* **37**, 10469–10478, <https://doi.org/10.1007/s13277-016-4850-3>
- 3 Waggoner, S.E. (2003) Cervical cancer. *Lancet* **361**, 2217–2225, [https://doi.org/10.1016/S0140-6736\(03\)13778-6](https://doi.org/10.1016/S0140-6736(03)13778-6)
- 4 Abulizi, G., Abulimiti, T., Li, H., Abuduxikuer, G., Mijiti, P., Zhang, S. et al. (2018) Knowledge of cervical cancer and Pap smear amongst Uyghur women from Xinjiang, China. *BMC Women's Health* **18**, 21, <https://doi.org/10.1186/s12905-018-0512-5>
- 5 De Freitas, A.C., Gurgel, A.P.A.D., Chagas, B.S., Coimbra, E.C. and Amaral, C.M.M.D. (2012) Susceptibility to cervical cancer: an overview. *Gynecol. Oncol.* **126**, 304–311, <https://doi.org/10.1016/j.ygyno.2012.03.047>
- 6 Wang, J., Chai, Y., Wang, T., Liu, J., Dai, P. and Liu, Z. (2015) Genetic alterations of PIK3CA and tumor response in patients with locally advanced cervical squamous cell carcinoma treated with cisplatin-based concurrent chemoradiotherapy. *Exp. Mol. Pathol.* **98**, 407–410, <https://doi.org/10.1016/j.yexmp.2015.03.014>
- 7 Kuguyo, O., Tsikai, N., Thomford, N.E., Magwali, T., Madziyire, M.G., Nhachi, C.F.B. et al. (2018) Genetic susceptibility for cervical cancer in african populations: what are the host genetic drivers? *OMICS* **22**, 468–483, <https://doi.org/10.1089/omi.2018.0075>
- 8 Miura, K., Mishima, H., Kinoshita, A., Hayashida, C., Abe, S., Tokunaga, K. et al. (2014) Genome-wide association study of HPV-associated cervical cancer in Japanese women. *J. Med. Virol.* **86**, 1153–1158, <https://doi.org/10.1002/jmv.23943>
- 9 Leo, P.J., Madeleine, M.M., Wang, S. and Schwartz, S.M. (2017) Defining the genetic susceptibility to cervical neoplasia-A genome-wide association study. *PLoS Genet.* **13**, e1006866, <https://doi.org/10.1371/journal.pgen.1006866>
- 10 Goldsmith, J.R. and Chen, Y.H. (2017) Regulation of inflammation and tumorigenesis by the TIPE family of phospholipid transfer proteins. *Cell Mol. Immunol.* **14**, 482–487, <https://doi.org/10.1038/cmi.2017.4>
- 11 Lou, Y. and Liu, S. (2011) The TIPE (TNFAIP8) family in inflammation, immunity, and cancer. *Mol. Immunol.* **49**, 4–7, <https://doi.org/10.1016/j.molimm.2011.08.006>
- 12 Padmavathi, G., Banik, K., Monisha, J., Bordoloi, D., Shabnam, B., Arfuso, F. et al. (2018) Novel tumor necrosis factor- $\alpha$  induced protein eight (TNFAIP8/TIPE) family: Functions and downstream targets involved in cancer progression. *Cancer Lett.* **432**, 260–271, <https://doi.org/10.1016/j.canlet.2018.06.017>
- 13 Menendez, D., Krysiak, O., Inga, A., Krysiak, B., Resnick, M.A. and Schonfelder, G. (2006) A SNP in the flt-1 promoter integrates the VEGF system into the p53 transcriptional network. *Proc. Natl Acad. Sci. U.S.A.* **103**, 1406–1411, <https://doi.org/10.1073/pnas.0508103103>
- 14 Levi, J.A. (1987) Cancer: principles and practice of oncology. *Patho* **19**, 109, [https://doi.org/10.1016/S0031-3025\(16\)39749-5](https://doi.org/10.1016/S0031-3025(16)39749-5)
- 15 Fine, B.A., Valente, P.T., Feinstein, G.I. and Dey, T. (2000) VEGF, flt-1, and KDR/flk-1 as prognostic indicators in endometrial carcinoma. *Gynecol. Oncol.* **76**, 33–39, <https://doi.org/10.1006/gyno.1999.5658>
- 16 Glubb, D.M., Parebrunet, L., Jantuslewinre, E., Jiang, C., Crona, D.J., Etheridge, A.S. et al. (2015) Functional FLT1 genetic variation is a prognostic factor for recurrence in stage I–III non–small-cell lung cancer. *J. Thorac. Oncol.* **10**, 1067–1075, <https://doi.org/10.1097/JTO.0000000000000549>

- 17 Xia, P., Li, B., Geng, T., Deng, Z., Dang, C., Chang, D. et al. (2015) FGFR2 gene polymorphisms are associated with breast cancer risk in the Han Chinese population. *Am. J. Cancer Res.* **5**, 1854–1861
- 18 Ren, H.T., Li, Y.M., Wang, X.J., Kang, H.F., Jin, T.B., Ma, X.B. et al. (2016) PD-1 rs2227982 polymorphism is associated with the decreased risk of breast cancer in Northwest Chinese women: a hospital-based observational study. *Medicine* **95**, e3760, <https://doi.org/10.1097/MD.0000000000003760>
- 19 Zhou, L., He, N., Feng, T., Geng, T., Jin, T. and Chen, C. (2015) Association of five single nucleotide polymorphisms at 6q25.1 with breast cancer risk in northwestern China. *Am. J. Cancer Res.* **5**, 2467–2475
- 20 Wacholder, S., Chanock, S., Garcia-Closas, M., Ghormli, L. El and Rothman, N. (2004) Assessing the probability that a positive report is false: an approach for molecular epidemiology studies. *J. Natl Cancer Inst.* **96**, 434–442, <https://doi.org/10.1093/jnci/djh075>
- 21 He, J., Wang, M.Y., Qiu, L.X., Zhu, M.L., Shi, T.Y., Zhou, X.Y. et al. (2013) Genetic variations of mTORC1 genes and risk of gastric cancer in an Eastern Chinese population. *Mol. Carcinog.* **52**, 70–79, <https://doi.org/10.1002/mc.22013>
- 22 Cui, J., Zhang, G., Hao, C., Wang, Y., Lou, Y., Zhang, W. et al. (2011) The expression of TIPE1 in murine tissues and human cell lines. *Mol. Immunol.* **48**, 1548–1555, <https://doi.org/10.1016/j.molimm.2011.04.023>
- 23 Zhang, Z., Liang, X., Gao, L., Ma, H., Liu, X., Pan, Y. et al. (2015) TIPE1 induces apoptosis by negatively regulating Rac1 activation in hepatocellular carcinoma cells. *Oncogene* **34**, 2566–2574, <https://doi.org/10.1038/ncr.2014.208>
- 24 Wu, X., Ma, Y., Cheng, J., Li, X., Zheng, H., Jiang, L. et al. (2017) TIPE1 function as a prognosis predictor and negative regulator of lung cancer. *Oncotarget* **8**, 78496–78506
- 25 Punt, S., Houwing-Duistermaat, J.J., Schulkens, I.A., Thijssen, V.L., Osse, E.M., de Kroon, C.D. et al. (2015) Correlations between immune response and vascularization qRT-PCR gene expression clusters in squamous cervical cancer. *Mol. Cancer* **14**, 71, <https://doi.org/10.1186/s12943-015-0350-0>
- 26 Hiratsuka, S., Nakamura, K., Iwai, S., Murakami, M., Itoh, T., Kijima, H. et al. (2002) MMP9 induction by vascular endothelial growth factor receptor-1 is involved in lung-specific metastasis. *Cancer Cell* **2**, 289–300, [https://doi.org/10.1016/S1535-6108\(02\)00153-8](https://doi.org/10.1016/S1535-6108(02)00153-8)
- 27 Fan, F., Wey, J.S., McCarty, M.F., Belcheva, A., Liu, W., Bauer, T.W. et al. (2005) Expression and function of vascular endothelial growth factor receptor-1 on human colorectal cancer cells. *Oncogene* **24**, 2647–2653, <https://doi.org/10.1038/sj.onc.1208246>
- 28 Wey, J.S., Fan, F., Gray, M.J., Bauer, T.W., McCarty, M.F., Somcio, R. et al. (2005) Vascular endothelial growth factor receptor-1 promotes migration and invasion in pancreatic carcinoma cell lines. *Cancer* **104**, 427–438, <https://doi.org/10.1002/cncr.21145>
- 29 Slattery, M.L., Lundgreen, A. and Wolff, R.K. (2014) VEGFA, FLT1, KDR and colorectal cancer: assessment of disease risk, tumor molecular phenotype, and survival. *Mol. Carcinog.* **53**, E140–50, <https://doi.org/10.1002/mc.22058>
